# Supplementary material for: Hyaluronic Acid-Conjugated Mesoporous Silica Nanoparticles Loaded with Dual Anticancer Agents for Chemophotodynamic Cancer Therapy
Source: Hindawi journal article supplement (doi:10.1155/2019/3481397), 2019-04-04
Supplement: f1 [file 3481397.f1.docx]

***(Supporting Information)***

**Hyaluronic Acid Conjugated Mesoporous Silica Nanoparticles Loaded with Dual**

**Anticancer Agents for Chemo-Photodynamic Cancer Therapy**

Sanghyo Parkaǂ, Hyungkyu Parkaǂ, Seokhyeon Jeonga, Bong Gu Yib, Kyeongsoon Parkc*, Jaehong Keya*

aDepartment of Biomedical Engineering, Yonsei University, 1 Yonseidae-gil, Wonju, Gangwon-do 26493, Korea

bInterdisciplinary Graduate Program for BIT Medical Convergence and Department of Biology, College of Natural Sciences, Kangwon National University, Chuncheon, Gangwon-do 24341, Korea

cDepartment of Systems Biotechnology, Chung-Ang University, Anseong, Gyeonggi-do 17546, Korea


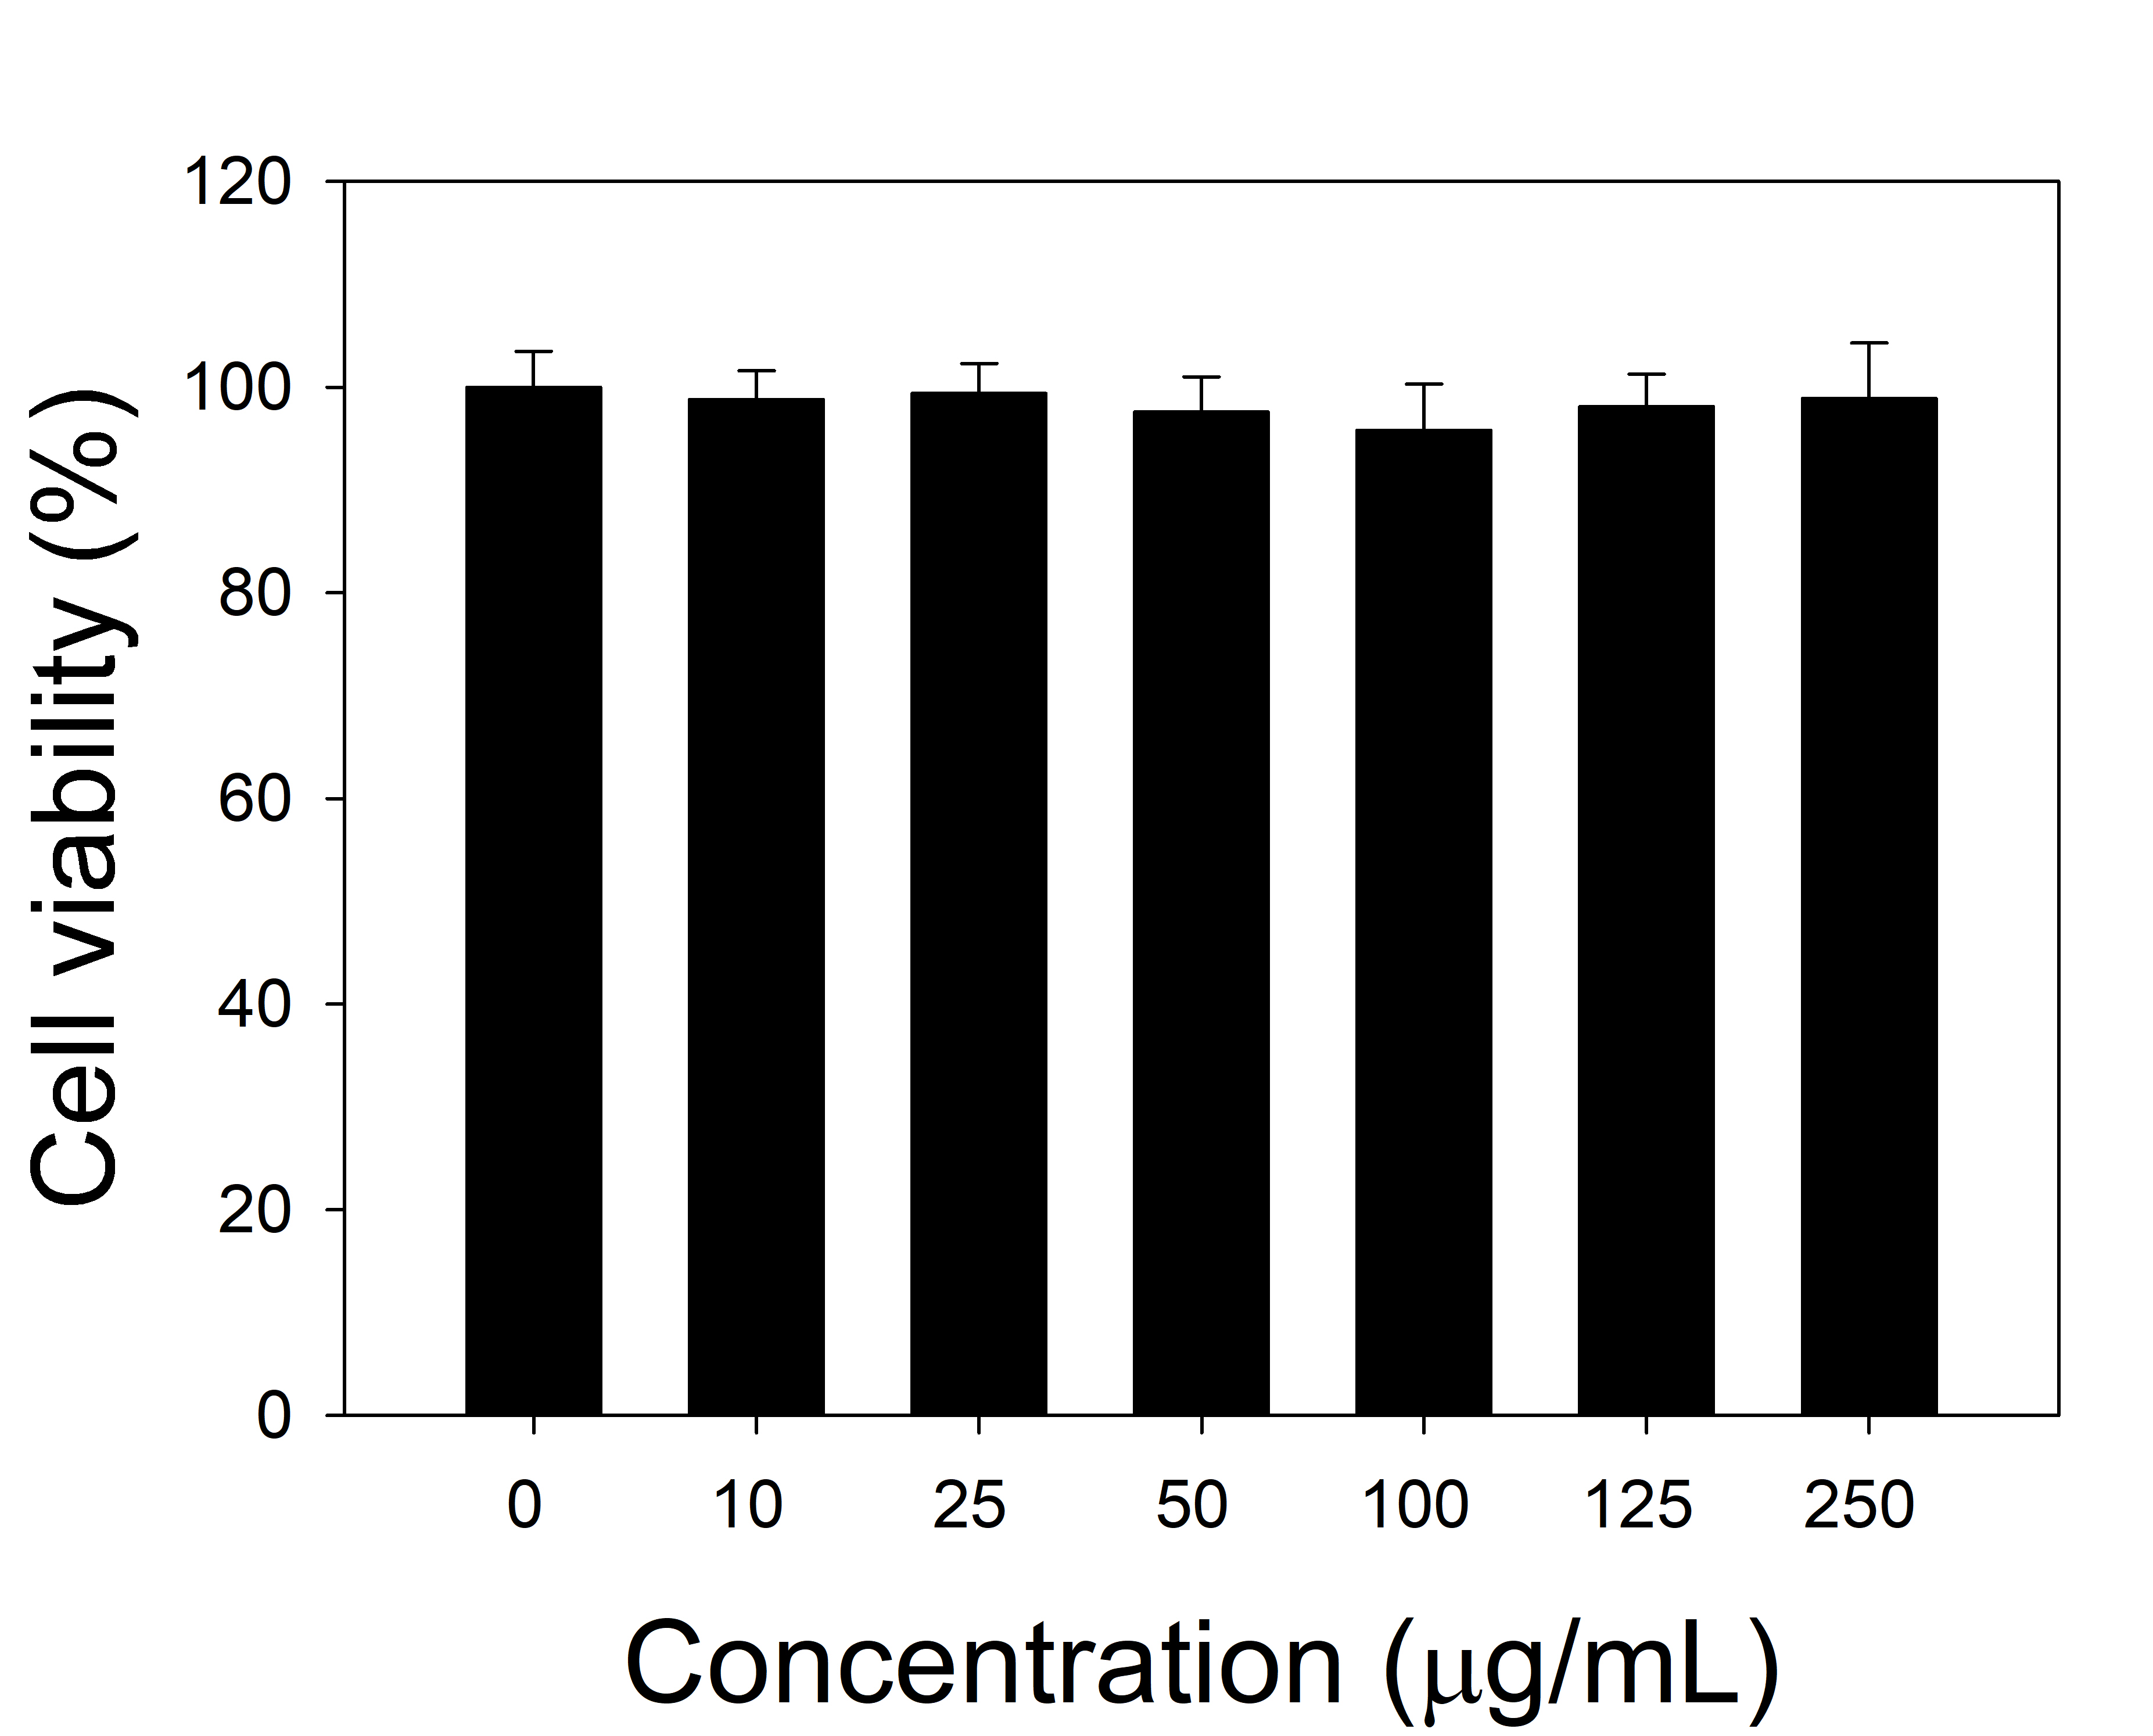


**Figure S1.** Cytotoxicity of HA-MSNs against SCC7 cells. After incubating SCC7 cells which were exposed to HA-MSNs in different concentration from 0 to 250 *μ*g/mL, the cell viability test was evaluated. The result shown that HA-MSNs are non-toxic and biocompatible nano-carriers.


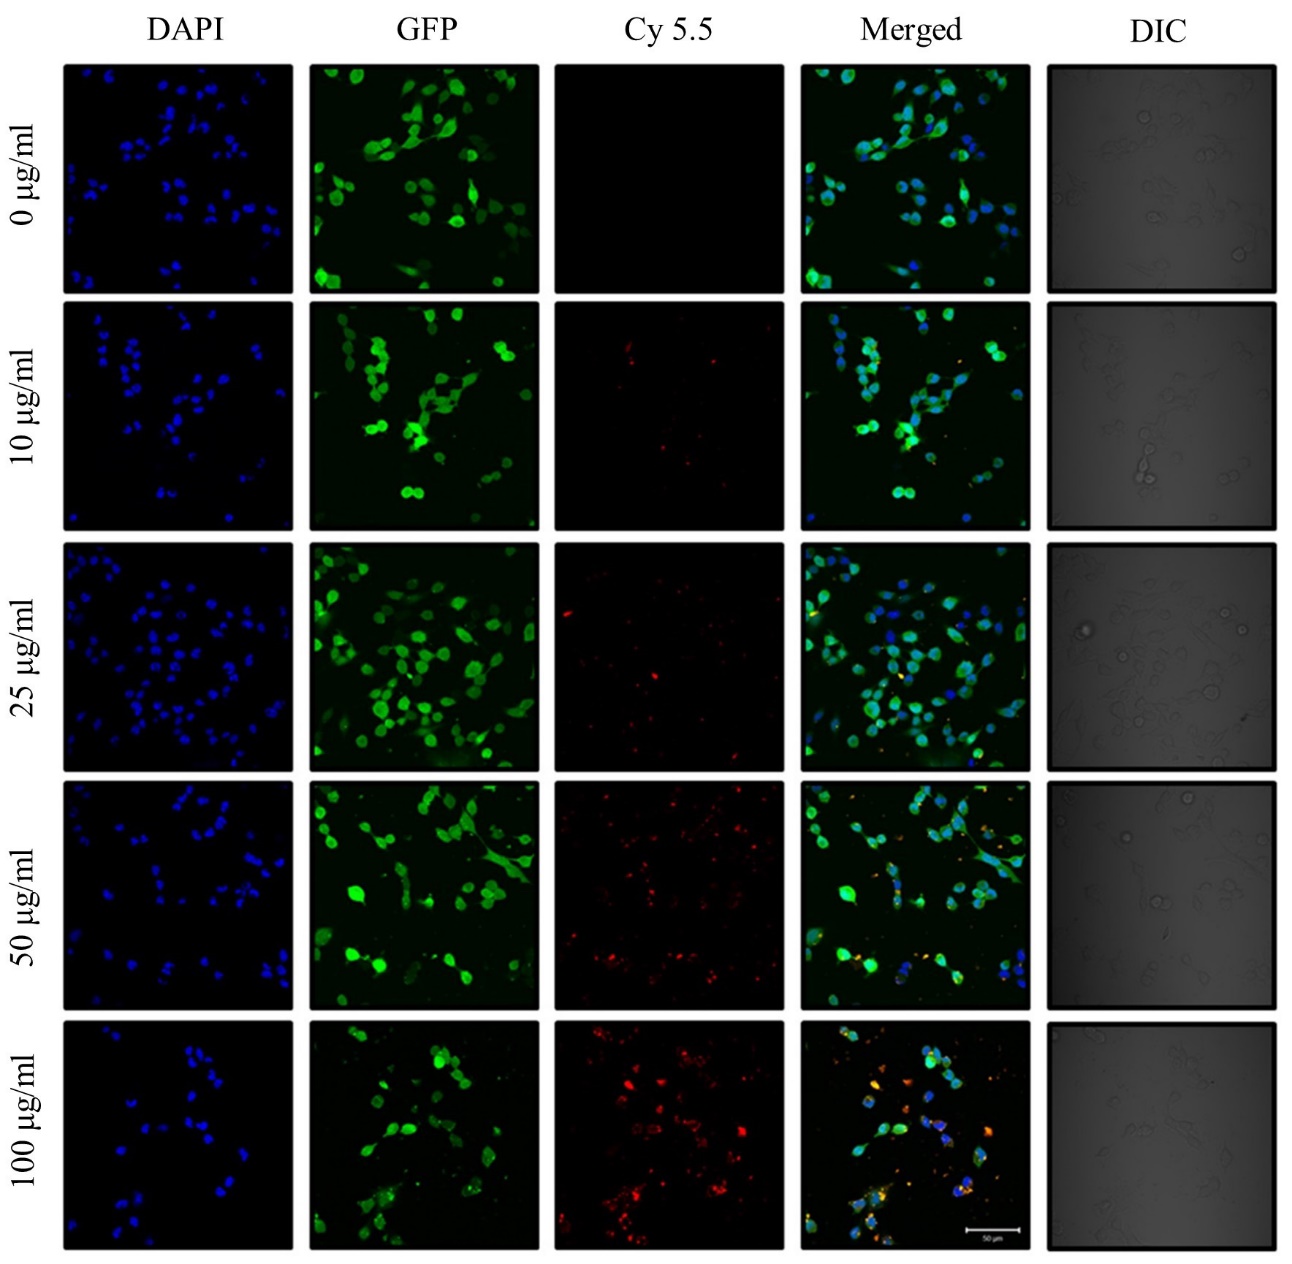


**Figure S2.** Cellular uptake of HA-Cy5.5-MSNs in SCC7 cells. Cellular uptake was determined after HA-Cy5.5-MSNs of different concentration (10, 25, 50, and 100 μg/mL) were added to the SCC7 cells. The result of cellular uptake shown that fluorescence intensity markedly increased in a concentration-dependent manner. In high concentration of HA-Cy5.5-MSNs, increased fluorescence signal was detected (scale bar: 50 *μ*m).

**
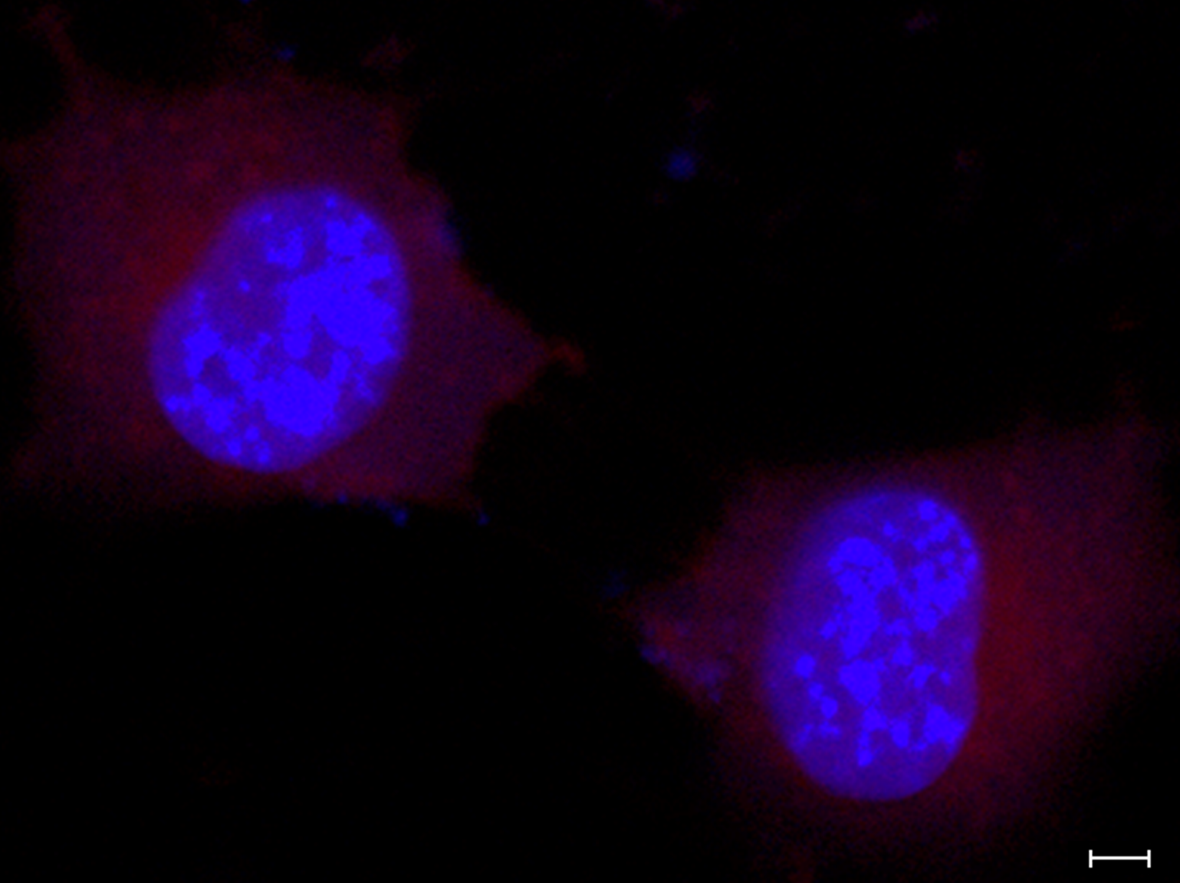
**

**Figure S3.** Intracellular uptakes of DOX/HA-MSNs localized in nucleus that is observed with DAPI staining in blue. Localized of DOX in Tumor cell could be found depending the incubation time or cell state. It can be remaining in cytosol if cells have been captured on time at which it is passing from cytosol to nucleus (scale bar: 5 *μ*m).

**
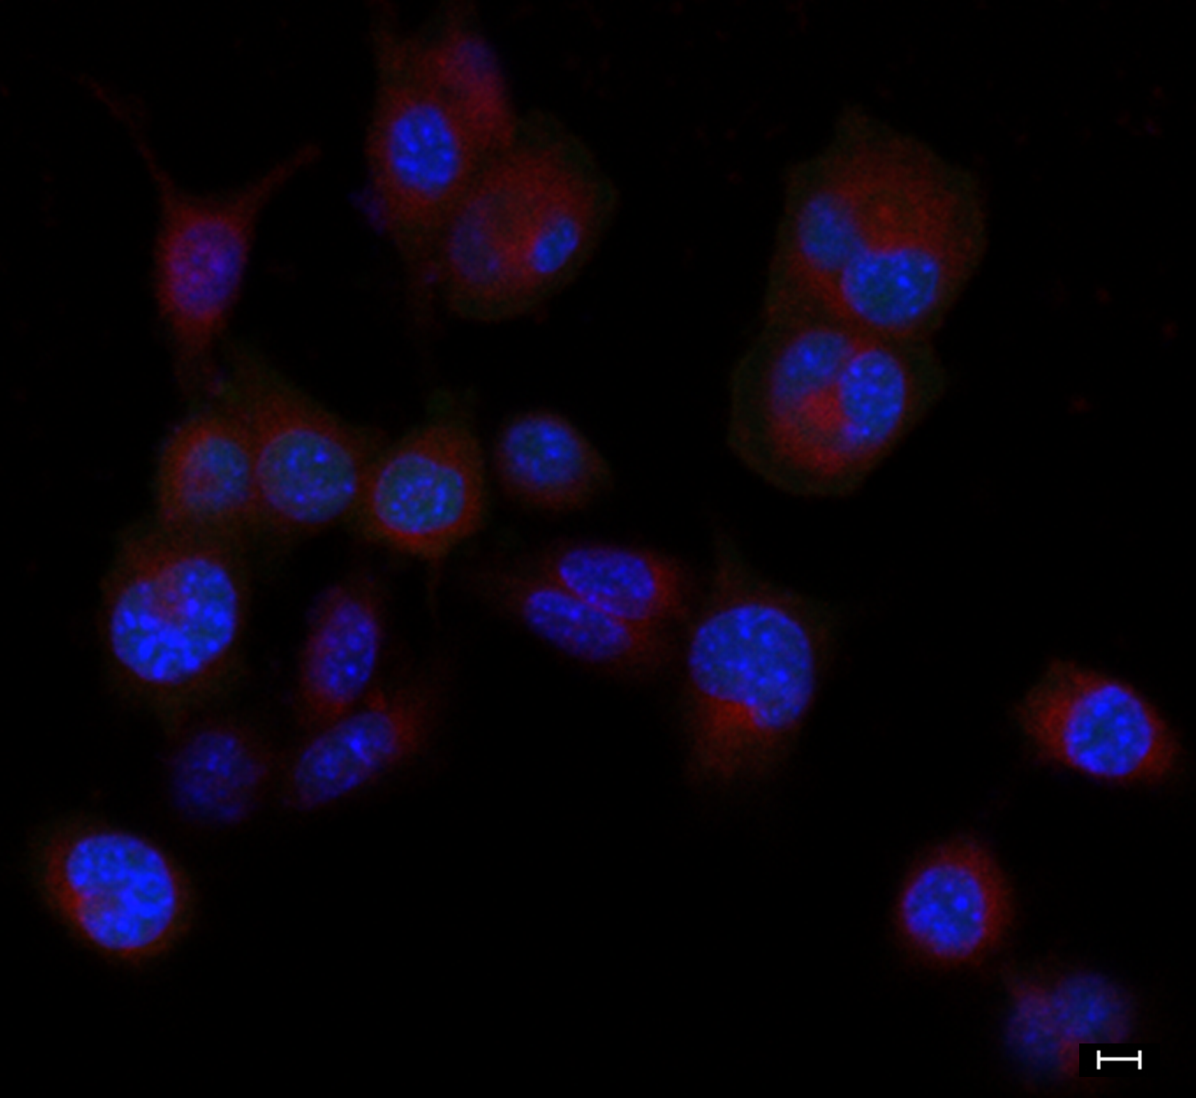
**

**Figure S4.** Intracellular Uptakes of Ce6/HA-MSNs. Ce6 is localized in the cytosol of SCC7. The nucleus is stained by DAPI in blue. There is no overlapped location between Ce6 and nucleus (scale bar: 5 *μ*m).
